# Supplementary material for: Enhancing the average thermoelectric figure of merit of elemental Te by suppressing grain boundary scattering
Source: Royal Society of Chemistry journal article supplement (doi:10.1039/d0ta02660c), 2020-01-01
Supplement: d0ta02660c1.pdf [file d0ta02660c1.pdf]

## Electronic Supplementary Information (ESI)

### **Enhancing Average Thermoelectric Figure of Merit of Elemental Te by Suppressing the Grain Boundary Scattering**

Yehao Wu, Feng Liu, Qi Zhang, Tiejun Zhu,\* Kaiyang Xia and Xinbing Zhao\*

State Key Laboratory of Silicon Materials and School of Materials Science and Engineering,  
Zhejiang University, Hangzhou 310027, China

Email: zhutj@zju.edu.cn; zhaoxb@zju.edu.cn

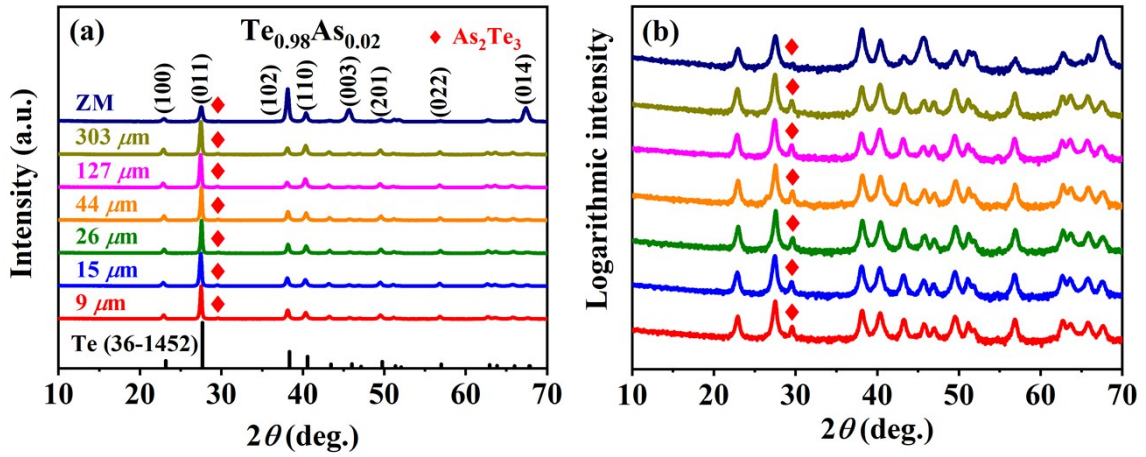

**Fig. S1** (a) Bulk XRD patterns for  $\text{Te}_{0.98}\text{As}_{0.02}$  samples. (b) Bulk XRD patterns with a logarithmic intensity axis for  $\text{Te}_{0.98}\text{As}_{0.02}$  samples, in which the impurity peaks are more readily to be recognized.

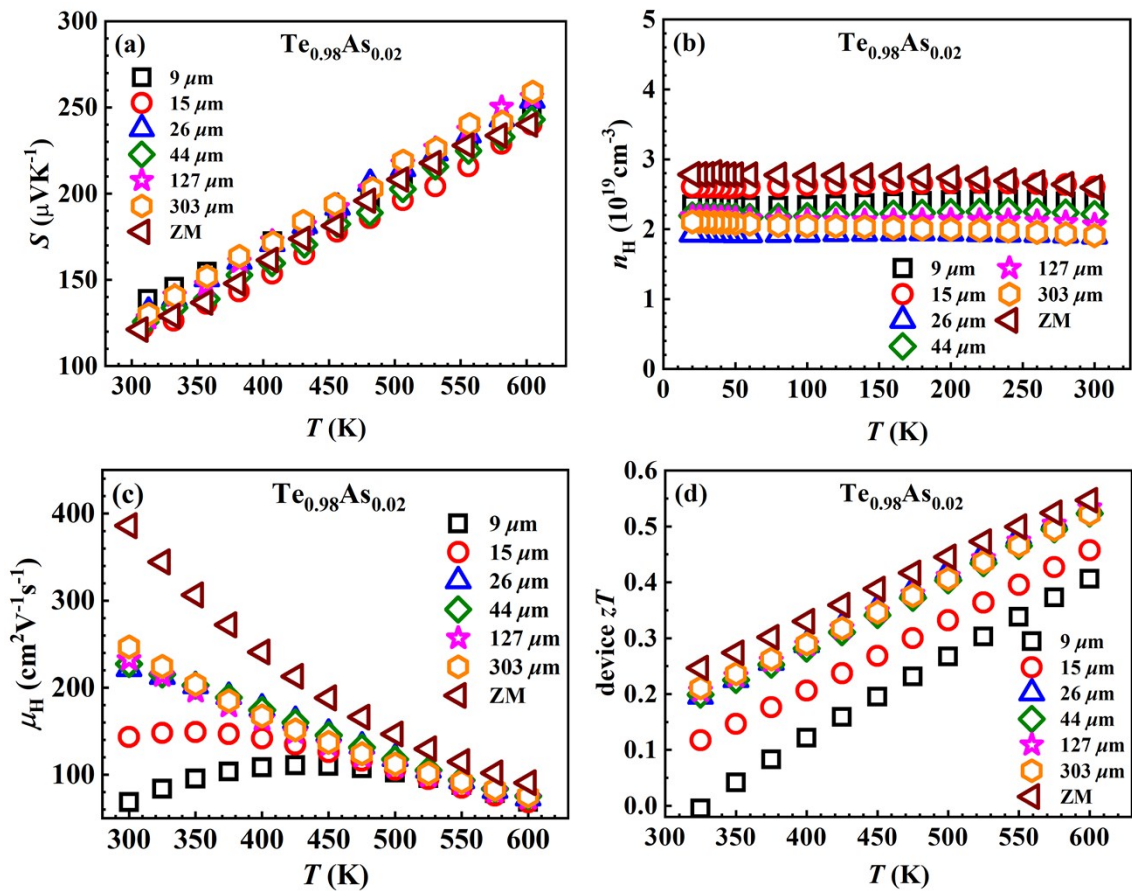

**Fig. S2** Temperature dependences of (a) Seebeck coefficient, (b) carrier concentration, (c) carrier mobility and (d) device  $zT$  for  $\text{Te}_{0.98}\text{As}_{0.02}$  samples. According to (a), the intrinsic conduction is not

obvious between 300 and 600 K for all Te samples, hence the carrier mobility in (c) is calculated by the formula  $\sigma/n_H e$ , where  $n_H$  is assumed to be constant. The cold-side temperature in (d) is fixed at 300 K.

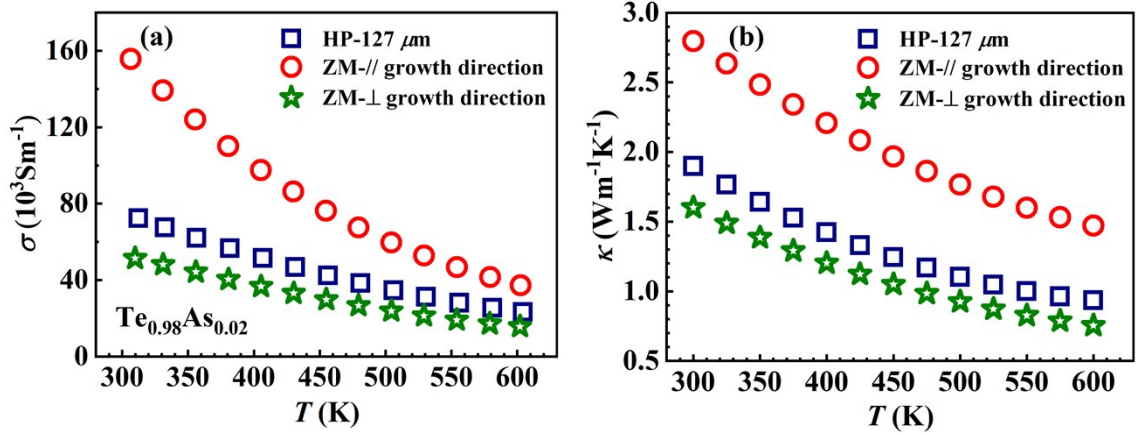

**Fig. S3** Temperature dependences of (a) electrical conductivity and (b) thermal conductivity for HP and ZM  $\text{Te}_{0.98}\text{As}_{0.02}$  samples.

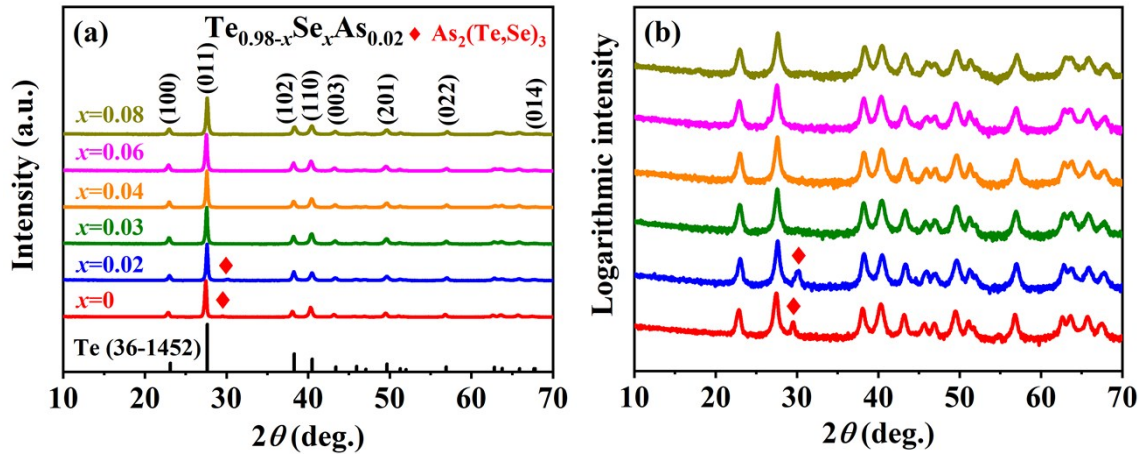

**Fig. S4** (a) Bulk XRD patterns for  $\text{Te}_{0.98-x}\text{Se}_x\text{As}_{0.02}$  samples. (b) Bulk XRD patterns with a logarithmic intensity axis for  $\text{Te}_{0.98-x}\text{Se}_x\text{As}_{0.02}$  samples, in which the impurity peaks are more readily to be recognized.

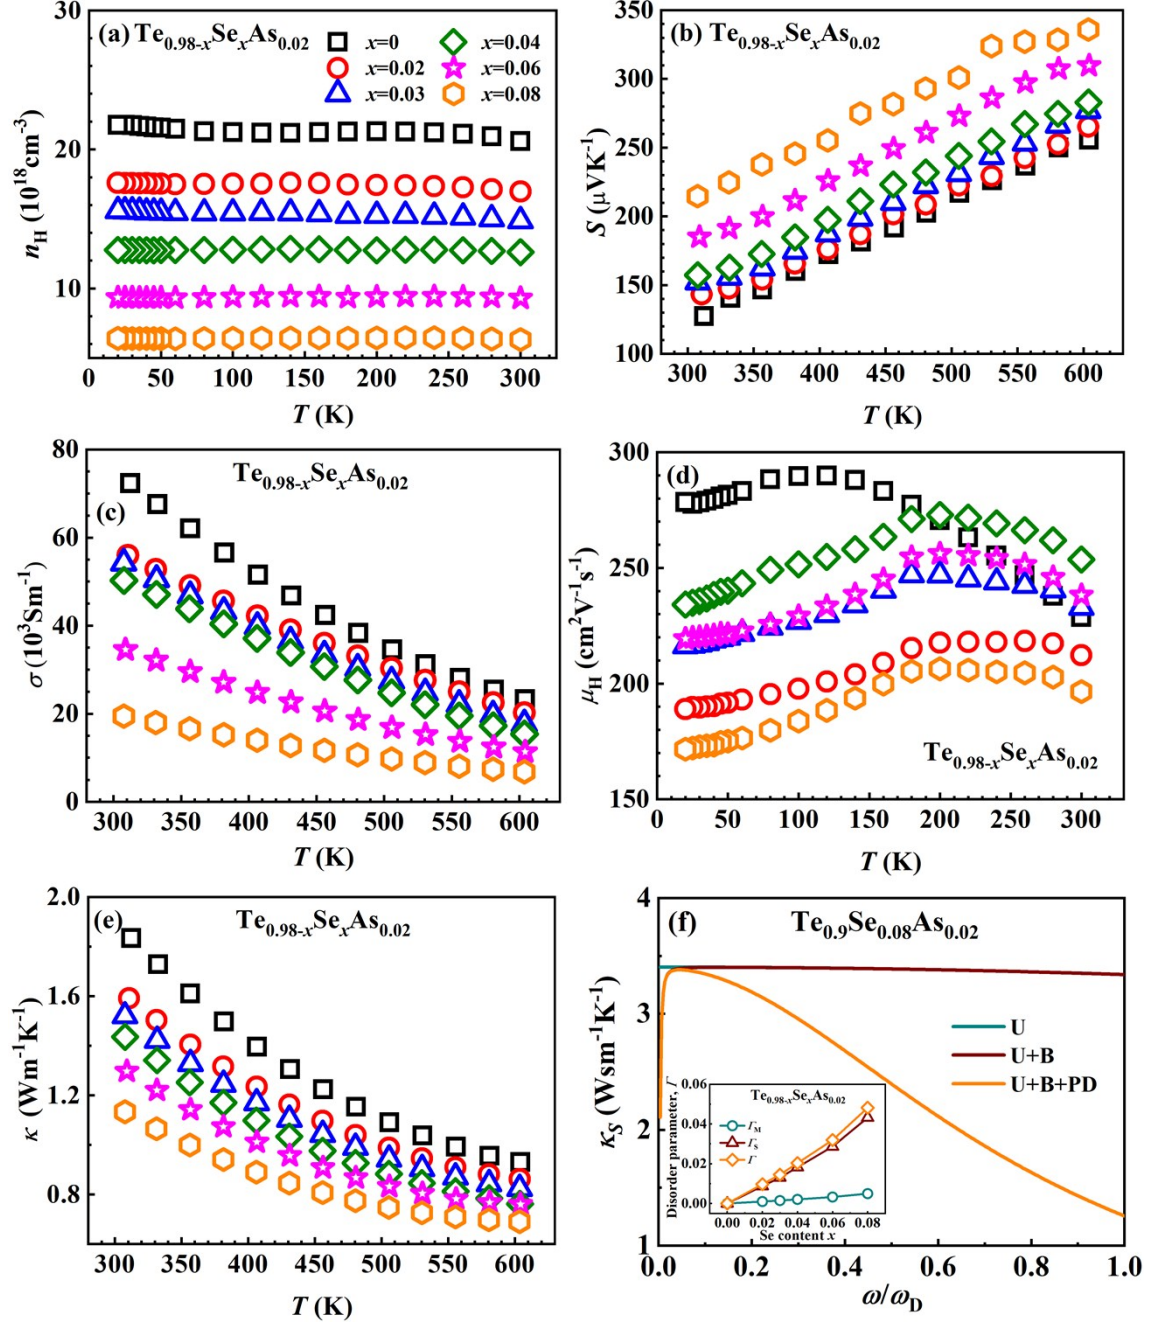

**Fig. S5** Temperature dependences of (a) carrier concentration, (b) Seebeck coefficient, (c) electrical conductivity, (d) carrier mobility and (e) thermal conductivity for  $\text{Te}_{0.98-x}\text{Se}_x\text{As}_{0.02}$  samples. (f) Phonon frequency dependence of spectral lattice thermal conductivity at 300 K for  $\text{Te}_{0.9}\text{Se}_{0.08}\text{As}_{0.02}$  alloys. The inset is the calculated disorder parameter  $\Gamma$  as a function of Se content for  $\text{Te}_{0.98-x}\text{Se}_x\text{As}_{0.02}$  samples.  $\Gamma$  consists of contribution from mass fluctuations  $\Gamma_M$  and strain field fluctuations  $\Gamma_S$ :  $\Gamma = \Gamma_M + \Gamma_S$ .

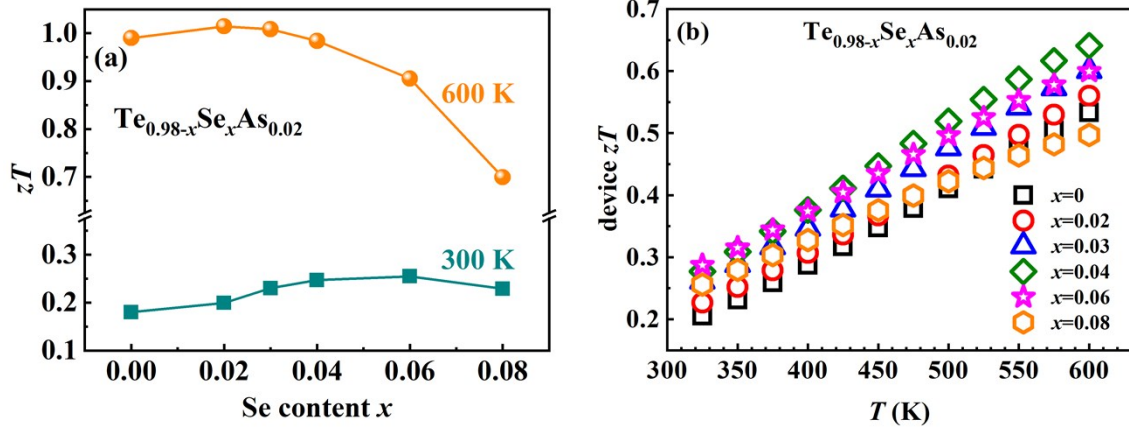

**Fig. S6** (a)  $zT$  as a function of Se content for  $\text{Te}_{0.98-x}\text{Se}_x\text{As}_{0.02}$  samples (300 and 600 K). (b) Temperature dependence of device  $zT$  for  $\text{Te}_{0.98-x}\text{Se}_x\text{As}_{0.02}$  samples. The cold-side temperature is fixed at 300 K.

### Calculation of lattice thermal conductivity based on the Debye-Callaway model

In the Debye-Callaway model,<sup>2-4</sup> the lattice thermal conductivity  $\kappa_L$  can be calculated according to the following equations:

$$\kappa_L = \frac{k_B}{2\pi^2\nu_s} \left( \frac{k_B T}{\hbar} \right)^3 \int_0^{\theta_D/T} \frac{x^4 e^x}{\tau_{tot}^{-1} (e^x - 1)^2} dx, x = \frac{\hbar\omega}{k_B T} \quad (\text{S1})$$

$$\begin{aligned} \tau_{tot}^{-1} &= \tau_B^{-1} + \tau_P^{-1} + \tau_U^{-1} \\ &= \frac{\nu_s}{d} + A\omega^4 + B\omega^2 T \exp\left(-\frac{\theta_D}{3T}\right) \end{aligned} \quad (\text{S2})$$

where  $k_B$  is the Boltzmann constant,  $\hbar$  is the reduced Planck's constant,  $\nu_s$  is the average sound velocity,  $T$  is the absolute temperature,  $\theta_D$  is the Debye temperature,  $\tau_{tot}$  is the total relaxation time,  $\omega$  is the phonon frequency,  $d$  is the grain size and roughly taken as the initial powder median size.  $\nu_s/d$  represents the grain boundary scattering.  $A$ ,  $B$  are the pre-exponential factors for point defects scattering and Umklapp process scattering, respectively. To be noted,  $B$  is obtained by fitting the temperature dependence of  $\kappa_L$  for the HP-303 $\mu\text{m}$   $\text{Te}_{0.98}\text{As}_{0.02}$  sample. The calculating parameters

used in the Debye-Callaway model are summarized in Table S1. Other parameters obtained from our previous work<sup>5</sup> are listed in Table S2. More calculation details can also be found in our previous work.<sup>5</sup>

**Table S1** The calculating parameters used in the Debye-Callaway model. Due to the small atom mass and tiny doping content, the As content in Te is hard to be detected.

| Nominal composition                               | $d$<br>( $\mu\text{m}$ ) | Actual composition                   | $\nu/d$<br>( $10^7\text{s}^{-1}$ ) | A<br>( $10^{-41}\text{s}^3$ ) | B<br>( $10^{-17}\text{sK}^{-1}$ ) |
|---------------------------------------------------|--------------------------|--------------------------------------|------------------------------------|-------------------------------|-----------------------------------|
| $\text{Te}_{0.98}\text{As}_{0.02}$                | 9                        | Te                                   | 17.6                               | 0                             | 2.2                               |
| $\text{Te}_{0.98}\text{As}_{0.02}$                | 15                       | Te                                   | 10.6                               | 0                             | 2.2                               |
| $\text{Te}_{0.98}\text{As}_{0.02}$                | 26                       | Te                                   | 6.1                                | 0                             | 2.2                               |
| $\text{Te}_{0.98}\text{As}_{0.02}$                | 44                       | Te                                   | 3.6                                | 0                             | 2.2                               |
| $\text{Te}_{0.98}\text{As}_{0.02}$                | 127                      | Te                                   | 1.3                                | 0                             | 2.2                               |
| $\text{Te}_{0.98}\text{As}_{0.02}$                | 303                      | Te                                   | 0.5                                | 0                             | 2.2                               |
| $\text{Te}_{0.96}\text{Se}_{0.02}\text{As}_{0.0}$ | 136                      | $\text{Te}_{0.993}\text{Se}_{0.007}$ | 1.2                                | 0.7                           | 2.2                               |
|                                                   | 2                        |                                      |                                    |                               |                                   |
| $\text{Te}_{0.95}\text{Se}_{0.03}\text{As}_{0.0}$ | 141                      | $\text{Te}_{0.990}\text{Se}_{0.010}$ | 1.1                                | 1.0                           | 2.2                               |
|                                                   | 2                        |                                      |                                    |                               |                                   |
| $\text{Te}_{0.94}\text{Se}_{0.04}\text{As}_{0.0}$ | 142                      | $\text{Te}_{0.986}\text{Se}_{0.014}$ | 1.1                                | 1.4                           | 2.2                               |
|                                                   | 2                        |                                      |                                    |                               |                                   |
| $\text{Te}_{0.92}\text{Se}_{0.06}\text{As}_{0.0}$ | 137                      | $\text{Te}_{0.977}\text{Se}_{0.023}$ | 1.2                                | 2.1                           | 2.2                               |

---

|                                                   |     |                                      |     |     |     |
|---------------------------------------------------|-----|--------------------------------------|-----|-----|-----|
| $\text{Te}_{0.9}\text{Se}_{0.08}\text{As}_{0.02}$ | 122 | $\text{Te}_{0.966}\text{Se}_{0.034}$ | 1.3 | 3.2 | 2.2 |
|---------------------------------------------------|-----|--------------------------------------|-----|-----|-----|

---

**Table S2** The parameters used to calculate the lattice thermal conductivity, taken from our previous work.<sup>5</sup>

---

| Parameters             | Sign [unit]                  | Value                  |
|------------------------|------------------------------|------------------------|
| Average sound velocity | $v_s$ [m.s <sup>-1</sup> ]   | 1588                   |
| Atomic volume          | $V$ [m <sup>3</sup> ]        | $3.38 \times 10^{-29}$ |
| Debye temperature      | $\theta_D$ [K]               | 146                    |
| Grüneisen parameter    | $\gamma$                     | 1.57                   |
| Poisson ratio          | $r$                          | 0.26                   |
| Density of mass        | $\rho$ [kg.m <sup>-3</sup> ] | $5.89 \times 10^3$     |

---

## References

- [S1] J. Yang, G. P. Meisner and L. Chen, *Appl. Phys. Lett.*, 2004, **85**, 1140-1142.
- [S2] J. Callaway and H. C. von Baeyer, *Phys. Rev.*, 1960, **120**, 1149-1154.
- [S3] E. F. Steigmeier and B. Abeles, *Phy. Rev.*, 1964, **136**, A1149-A1155.
- [S4] T. J. Zhu, C. G. Fu, H. H. Xie, Y. T. Liu, B. Feng, J. Xie and X. B. Zhao, *Europhys. Lett.*, 2013, **104**, 46003.

---

[S5] Y. H. Wu, Q. Zhang, F. Liu, T. Fang, T. J. Zhu and X. B. Zhao, *Adv. Electron. Mater.*, 2020, 2000038.
